## RESEARCH ARTICLE

# Association of age-related hearing loss, tinnitus, and chronic low back pain in middle-aged and older Korean adults

Hye-Mi Noh<sup>1</sup>, Yi Hwa Choi<sup>2\*</sup>, Jee Hye Wee<sup>3</sup>, Hong Ji Song<sup>1</sup>, Hye-Ji An<sup>1</sup>, Keum Ji Kim<sup>1</sup>, Soo Kyung Lee<sup>2</sup>, Min Soo Jang<sup>2</sup>, Nayoung Yeon<sup>2</sup>

**1** Department of Family Medicine, Hallym University Sacred Heart Hospital, College of Medicine, Hallym University, Anyang, Korea, **2** Department of Anesthesiology and Pain Medicine, Hallym University Sacred Heart Hospital, College of Medicine, Hallym University, Anyang, Korea, **3** Department of Otorhinolaryngology-Head and Neck Surgery, Hallym University College of Medicine, Anyang, Korea

\* [pcyhchoi@hallym.or.kr](mailto:pcyhchoi@hallym.or.kr)

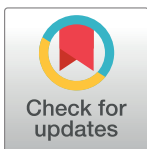

## OPEN ACCESS

**Citation:** Noh H-M, Choi YH, Wee JH, Song HJ, An H-J, Kim KJ, et al. (2023) Association of age-related hearing loss, tinnitus, and chronic low back pain in middle-aged and older Korean adults. *PLoS ONE* 18(9): e0291396. <https://doi.org/10.1371/journal.pone.0291396>

**Editor:** Tadashi Ito, Aichi Prefectural Mikawa Aotori Medical and Rehabilitation Center for Developmental Disabilities, JAPAN

**Received:** March 21, 2023

**Accepted:** August 28, 2023

**Published:** September 8, 2023

**Copyright:** © 2023 Noh et al. This is an open access article distributed under the terms of the [Creative Commons Attribution License](https://creativecommons.org/licenses/by/4.0/), which permits unrestricted use, distribution, and reproduction in any medium, provided the original author and source are credited.

**Data Availability Statement:** Data cannot be shared publicly because of the legal restrictions, concerns for patient privacy, and third party ownership of the data by the Korea National Health & Nutrition Examination Survey (KNHANES). However, the data are directly obtainable upon request, either by accessing <https://knhanes.cdc.go.kr/knhanes/eng/index.do> or by sending an e-mail: [knhanes@korea.kr](mailto:knhanes@korea.kr).

## Abstract

This was a cross-sectional study conducted to evaluate the association between hearing impairment and low back pain (LBP) using data from the Korean National Health and Nutrition Examination Survey. A total of 5,504 middle-aged and older Korean adults (aged  $\geq 50$  years old) who underwent plain radiography of the lumbar spine and pure tone audiometry were included. The presence of LBP was evaluated using a questionnaire, which included a question on whether the patient had experienced LBP that lasted for more than 30 days during the past three months. Patients with age-related hearing loss (ARHL) were defined as those with bilateral hearing impairment who met the following criteria: 1) normal otologic examination results, 2) average pure-tone hearing thresholds of  $\leq 15$  dB in both ears, and 3) no occupational noise exposure. Multivariable logistic regression analysis showed that ARHL was not associated with LBP (odds ratio, 1.33; 95% CI, 0.94–1.89) after adjusting for potential confounders in the final model. However, when participants without both ARHL and tinnitus were defined as the reference group, the results showed that the participants with both ARHL and tinnitus were more likely to have LBP (OR, 1.86; 95% CI, 1.11–3.11). These results indicate that ARHL with tinnitus is significantly associated with LBP. We recommend that elderly patients with ARHL and tinnitus increase their daily physical activities and engage in more muscle-strengthening exercises to prevent LBP.

## Introduction

The World Health Organization reported that approximately 432 million adults have disabling hearing loss, and that more than 5% of the world population requires rehabilitation for hearing loss [1]. The incidence of age-related hearing loss (ARHL) in Korea is projected to increase about twice as much in the next 20 years [2]. ARHL can cause social isolation attributable to decreased physical function by impairing effective communication and inducing depression and possible cognitive impairment [3, 4].

**Funding:** The authors received no specific funding for this work.

**Competing interests:** The authors have declared that no competing interests exist.

Low back pain (LBP) is the most common musculoskeletal symptom experienced by older patients [5]. Factors such as age, sex, genetic predisposition, occupation, smoking, race, job satisfaction, psychological issues, anthropometry, and posture are associated with non-specific back pain [6]. Hearing loss is not a primary risk factor for LBP. However, older patients with back pain and hearing loss are frequently encountered in clinical practice, and communication difficulties during consultation may result in refractory chronic pain. Older patients with mild or severe hearing impairment are often unable to maintain an exercise regimen due to cognitive impairment caused by reduced auditory stimulation and disrupted social interactions. In addition, the severity of hearing loss is linearly associated with the risk of dementia and cognitive dysfunction measured using the Mini-Mental State Examination scale [7, 8]. Further, correlations between ARHL and the potential risk factors for chronic LBP, such as sarcopenia or osteoporosis, have been reported [9, 10].

Hearing loss is often accompanied by tinnitus, and the prevalence of tinnitus increases with aging [11]. Previous studies have indicated that tinnitus is associated with chronic pain [12, 13]. Therefore, we propose that ARHL or tinnitus may be associated with intractable LBP among older adults. Thus, the aim of this study was to evaluate the association between ARHL, tinnitus, and LBP in older adults using a nationally representative sample of middle-aged and older Korean adults.

## Methods

### Study population

We used data from the 2010–2011 cycle of the Korean National Health and Nutrition Examination Survey (KNHANES V-1 and V2). The KNHANES has been conducted annually by the Korea Disease Control and Prevention Agency (KDCA) since 1998. We selected 6,104 participants (aged  $\geq 50$  years old) who underwent plain radiography of the lumbar spine for this study. The presence of LBP was evaluated using a questionnaire. We excluded participants who did not respond to the question on LBP in the questionnaire ( $n = 127$ ) and those that did not undergo a hearing test ( $n = 473$ ). Finally, 5,504 individuals were included in the study (Fig 1).

All procedures were approved by the ethics committee of the KDCA (Institutional Review Board numbers: 2010-02CON-21-C and 2011-02CON-06-C). Informed consent was obtained from all the KNHANES participants. Requirement for the informed consent in the present study was waived by the board owing to the retrospective nature of the study. The KNHANES data are publicly available on the KNHANES website (<https://knhanes.cdc.go.kr/knhanes/eng/index.do>).

### LBP

LBP was defined as responding “yes” to the question, “Have you had LBP for more than 30 days in the past three months?”

### Audiometric measurements

Otorhinolaryngologists performed hearing tests in a soundproof booth using a diagnostic audiometer (SA-203; Entomed, Malmoe, Sweden). The test was performed at frequencies of 0.5, 1, 2, 3, 4, and 6 kHz. The otorhinolaryngologists also performed otologic examinations using a 4-mm 0° endoscope (Xion GmbH, Berlin, Germany) to evaluate the tympanic membrane or middle ear. Hearing impairment was defined as a pure tone threshold greater than an average of 25 dB at 0.5, 1, 2, and 4 kHz [14]. We categorized the patients into those with

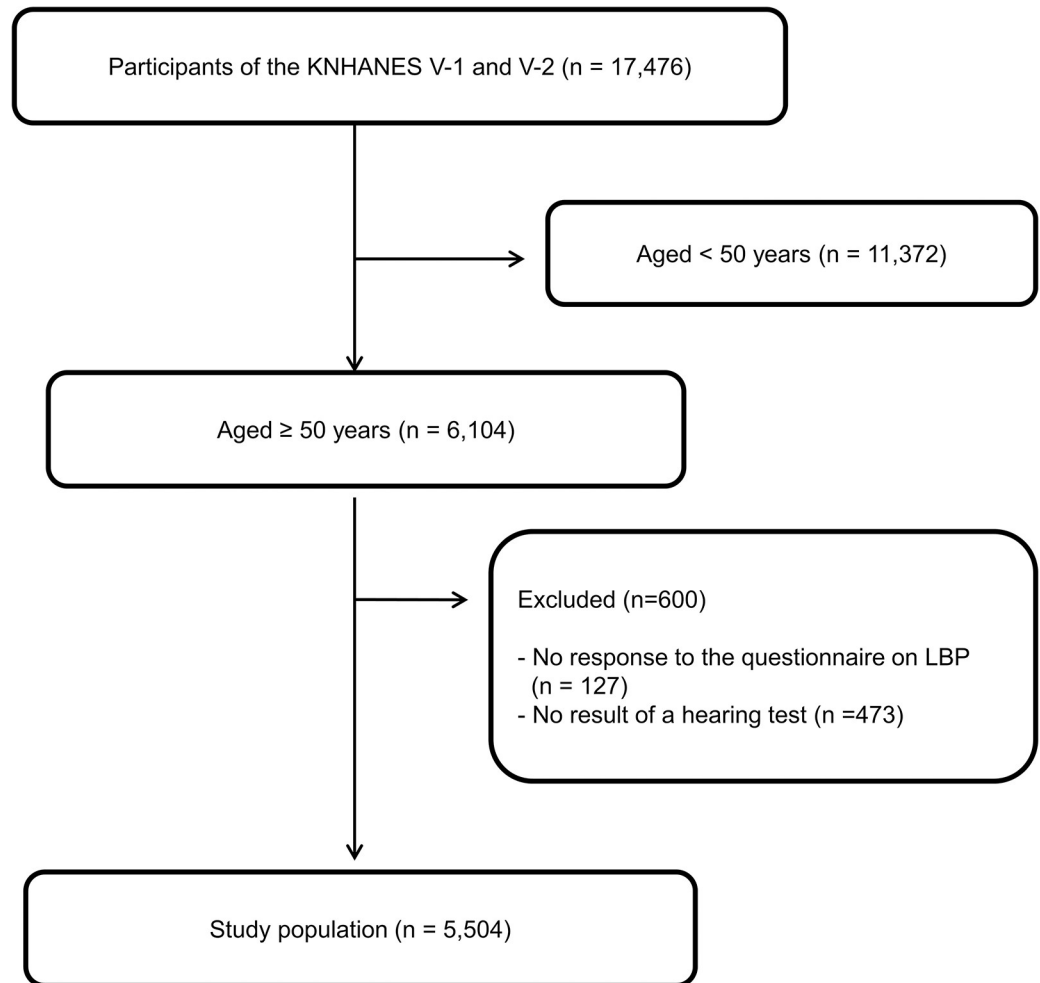

**Fig 1. Study flow diagram.**

<https://doi.org/10.1371/journal.pone.0291396.g001>

normal hearing, unilateral hearing impairment, and bilateral hearing impairment. Patients with ARHL were defined as patients with bilateral hearing impairments who met the following criteria: 1) normal otologic examination results, 2) average pure-tone thresholds of  $\leq 15$  dB in both ears, and 3) no occupational noise exposure. The severity of hearing impairment was defined based on the hearing threshold of the better ear as follows: mild, 26–40 dB; moderate, 41–70 dB; and severe,  $>71$  dB [15].

### Definitions of subjective hearing impairment and tinnitus

We defined subjective hearing impairment as having test results that indicate normal hearing but having difficulty hearing. Participants were asked to the following question to estimate their hearing ability: “Please select the statement that best describes your hearing (without hearing aids): 1) no difficulty, 2) a little difficulty, 3) a lot of difficulty, and 4) I can’t hear at all.” Patients who selected 2), 3), or 4) were defined as those with hearing difficulties. Tinnitus was assessed using the following question: “In the past year, have you experienced any noise in your ears (crackling, beeping, humming, machinery, etc.)?”. Participants who answered “yes” to the question were defined as patients with tinnitus.

## Other variables

The following demographic data were collected: age, sex, education, household income, occupation, occupational noise exposure, monthly alcohol consumption (< once vs.  $\geq$  once/month), smoking status (ex-smoker and current smoker), and physical activity (muscle-strengthening exercises or walking physical activity). Engagement in muscle-strengthening exercises was assessed using the following question: “In the past week, how many days did you engage in strength training exercises, such as push-ups, sit-ups, or lifting dumbbells, weights, or barbells?” Engagement in walking physical activity was assessed by asking participants the following question: “How many days in the past week did you walk for at least 10 minutes at a time, and on those days, how long do you usually walk during the day?” Regular muscle-strengthening exercise was defined as performing strength exercises at least twice a week. Regular walking physical activity was defined as walking for at least 30 minutes for five days a week. Comorbidities (hypertension, diabetes mellitus, chronic kidney disease, rheumatoid arthritis, and depression) were identified using self-report questionnaires. Plain radiographs of the lumbar spine were obtained using an SD 3000 Synchro Stand (Accele Ray SYFM Co., Seoul, Korea). Musculoskeletal radiologists evaluated the severity of osteoarthritis in facet joints according to the Kellgren–Lawrence grading system. The radiologic grade was classified using the method proposed by Yoshimura et al. [16]: 0, normal (no abnormalities including slight osteophytes); 1, suspicious (clear osteophytes); and 2, abnormal (stenosis, osteosclerosis, and large osteophytes). Bone mineral density and body composition were measured using DEXA (DISCOVERY-W, Hologic Inc., Marlborough, MA, USA). Appendicular skeletal muscle mass (ASM) was defined as the muscle mass of the bilateral upper and lower extremities, and the ASM index was calculated as  $ASM/(height [m])^2$  [17]. Limitation of activity was defined as answering “yes” to the question “In the past month, have you had a day when you had to spend almost the entire day in bed due to illness or injury?”. Dietary intake was assessed using a 24 h dietary recall method, and total energy and nutrient intake were calculated according to the National Standard Food Composition Table [18].

## Statistical analysis

We performed complex-sample analysis because the KNHANES data were extracted using a two-stage stratified cluster sampling method. Continuous variables are presented as mean  $\pm$  standard error, whereas categorical data are presented as the estimated percentage (standard error). The t-test and  $\chi^2$  test were used to compare the general characteristics of the patients and the prevalence of hearing impairments according to the presence or absence of LBP. Multivariable logistic regression analysis was performed to examine the association between hearing impairment and LBP. Age and sex were adjusted in Model 1. Socioeconomic status (household income, occupation, and education) and lifestyle factors (smoking status, alcohol consumption, and muscle-strengthening exercise) were additionally included in Model 2. ASM index, osteoporosis, Kellgren–Lawrence grading of the lumbar spine, and comorbidities were also included in Model 3. Tinnitus, use of a hearing aid or cochlear implant, limitation of activity, and dietary intake of protein, retinol, riboflavin, and niacin were added to the final model (Model 4). All statistical analyses were performed using SPSS software (version 25.0; IBM Corp., Armonk, NY, USA).  $P < 0.05$  was considered statistically significant.

## Results

### General characteristics

Of the 5,504 participants included, 1,414 (25.7%) had LBP. [Table 1](#) shows the general characteristics of the participants categorized according to the presence of LBP. The participants with

Table 1. Characteristics of the study population.

| Variables                                             | Low back pain   |                | P value |
|-------------------------------------------------------|-----------------|----------------|---------|
|                                                       | Yes (n = 1,414) | No (n = 4,090) |         |
| Age                                                   |                 |                | <0.001  |
| 50–59 years                                           | 34.0% (1.8%)    | 53.7% (1.1%)   |         |
| 60–69 years                                           | 30.2% (1.5%)    | 27.6% (0.8%)   |         |
| 70–79 years                                           | 27.4% (1.5%)    | 16.1% (0.7%)   |         |
| ≥ 80 years                                            | 8.4% (1.0%)     | 2.6% (0.3%)    |         |
| Sex                                                   |                 |                | <0.001  |
| Male                                                  | 26.9% (1.5%)    | 53.1% (0.8%)   |         |
| Female                                                | 73.1% (1.5%)    | 46.9% (0.8%)   |         |
| BMI (kg/m)                                            | 24.0 (0.10)     | 24.0 (0.06)    | 0.992   |
| Smoking                                               |                 |                | <0.001  |
| Ex-smoker                                             | 16.1% (1.2%)    | 27.8% (0.8%)   |         |
| Current smoker                                        | 14.9% (1.2%)    | 21.3% (0.9%)   |         |
| Alcohol consumption                                   | 47.8% (3.5%)    | 61.2% (1.7%)   | 0.001   |
| Muscle-strengthening exercise (≥2 times/week)         | 15.2% (1.2%)    | 27.7% (1.0%)   | <0.001  |
| Walking physical activity                             | 35.5% (1.8%)    | 39.4% (1.0%)   | 0.051   |
| Educational level                                     |                 |                | <0.001  |
| ≤ Elementary school                                   | 67.1% (1.7%)    | 38.6% (1.2%)   |         |
| Middle school                                         | 14.7% (1.2%)    | 20.7% (0.8%)   |         |
| High school                                           | 13.1% (1.1%)    | 27.6% (0.9%)   |         |
| ≥ College                                             | 5.1% (0.8%)     | 13.1% (1.0%)   |         |
| Household income                                      |                 |                | <0.001  |
| Low                                                   | 32.3% (1.7%)    | 24.0% (1.0%)   |         |
| Lower middle                                          | 27.6% (1.5%)    | 25.2% (1.0%)   |         |
| Upper middle                                          | 23.0% (1.5%)    | 26.2% (0.9%)   |         |
| High                                                  | 17.1% (1.3%)    | 24.5% (1.1%)   |         |
| Occupation                                            |                 |                | <0.001  |
| Office work                                           | 3.3% (0.6%)     | 10.6% (0.7%)   |         |
| Sales and services                                    | 8.9% (1.0%)     | 12.8% (0.8%)   |         |
| Agriculture, forestry, and fishery                    | 17.9% (2.2%)    | 13.5% (1.5%)   |         |
| Machine fitting and simple labor                      | 18.9% (1.6%)    | 23.6% (1.0%)   |         |
| Unemployed                                            | 50.9% (1.9%)    | 39.4% (1.2%)   |         |
| Occupational noise exposure (%)                       | 10.9% (1.1%)    | 14.1% (0.9%)   | 0.015   |
| DEXA                                                  |                 |                |         |
| Appendicular skeletal muscle mass/height <sup>2</sup> | 6.31 (0.05)     | 6.74 (0.03)    | <0.001  |
| Osteoporosis                                          | 33.5% (1.8%)    | 16% (0.8%)     | 0.001   |
| Lumbar spine osteoarthritis                           |                 |                | 0.015   |
| Normal                                                | 5.2% (2.4%)     | 15.6% (2.7%)   |         |
| Grade 1                                               | 45.4% (4.6%)    | 48.0% (3.5%)   |         |
| Grade 2                                               | 49.4% (4.6%)    | 36.3% (3.5%)   |         |
| Comorbidity                                           |                 |                |         |
| Hypertension                                          | 44.9% (1.7%)    | 35.6% (1.0%)   | <0.001  |
| Diabetes mellitus                                     | 16.1% (1.3%)    | 14.4% (0.7%)   | 0.215   |
| Chronic kidney disease                                | 0.9% (0.3%)     | 0.3% (0.1%)    | 0.03    |
| Rheumatoid arthritis                                  | 6.7% (0.8%)     | 2.8% (0.3%)    | <0.001  |
| Depression                                            | 7.9% (0.9%)     | 4.1% (0.4%)    | <0.001  |
| Limitation of activity (bed rest in the past month)   | 19.2% (1.4%)    | 5.1% (0.5%)    | <0.001  |

(Continued)

Table 1. (Continued)

| Variables                      | Low back pain   |                | P value |
|--------------------------------|-----------------|----------------|---------|
|                                | Yes (n = 1,414) | No (n = 4,090) |         |
| Dietary intake                 |                 |                |         |
| Total energy intake (kcal/day) | 1704.9 (30.25)  | 1960.9 (18.28) | <0.001  |
| Protein intake (g/day)         | 55.9 (1.35)     | 67.2 (0.77)    | <0.001  |
| Retinol ( $\mu$ g/day)         | 57.7 (5.77)     | 73.9 (2.69)    | 0.045   |
| Riboflavin (mg/day)            | 0.93 (0.03)     | 1.14 (0.02)    | 0.022   |
| Niacin (mg/day)                | 13.6 (0.37)     | 16.2 (0.19)    | <0.001  |

Data are presented as mean  $\pm$  standard error or estimated percentage (standard error).

<https://doi.org/10.1371/journal.pone.0291396.t001>

LBP were older and had a higher proportion of women than the participants without LBP (both  $P < 0.001$ ). Smoking, alcohol consumption, and performing muscle-strengthening exercise were more common among participants without LBP than among those with LBP ( $P < 0.001$ ,  $0.001$ , and  $< 0.001$ , respectively). The participants with LBP had lower educational levels and household incomes than those without LBP (both  $P < 0.001$ ). Regarding occupation, the proportions of participants with LBP who were unemployed or employed in the agriculture, forestry, and fishery industries were higher than those of the participants without LBP in these occupation categories ( $P < 0.001$ ). Occupational noise exposure was more common in participants without LBP than in those with LBP ( $P = 0.015$ ). Participants with LBP had a lower ASM index and a higher prevalence of osteoporosis and grade 2 lumbar spine osteoarthritis than those without LBP ( $P < 0.001$ ,  $0.001$ , and  $0.015$ , respectively). Participants with LBP had a higher number of comorbidities, including hypertension, chronic kidney disease, rheumatoid arthritis, and depression, than those without LBP ( $P < 0.001$ ,  $P = 0.03$ ,  $P < 0.001$ , and  $P < 0.001$ , respectively).

### Hearing impairment according to LBP

Table 2 shows the prevalence of hearing impairment in the study population according to the presence of LBP. Unilateral and bilateral hearing impairments were more common in participants with LBP than in those without LBP ( $P < 0.001$ ). ARHL and mild, moderate, and severe hearing impairments were more common in participants with LBP than in those without LBP (both  $P < 0.001$ ). Participants with LBP showed higher mean hearing thresholds at the four frequencies (0.5, 1, 2, and 4 kHz) and high frequencies (4 and 6 kHz) in both ears than those without LBP (both  $P < 0.001$ ). Subjective hearing impairment was more common in participants with LBP than in those without LBP ( $P = 0.007$ ).

### Multivariable logistic regression analysis of the association between hearing impairment and LBP

Table 3 shows the results of multivariable logistic regression analysis of the association between hearing impairment and LBP. After adjusting for age and sex in Model 1, the adjusted odds of hearing impairment, bilateral hearing impairment, ARHL, and subjective hearing impairment in participants with LBP were higher than those in participants without LBP (odds ratio [OR], 1.3, 1.36, 1.54, and 1.61; 95% CI, 1.09–1.54, 1.11–1.66, 1.21–1.97, and 1.15–2.26; respectively). However, after adjusting for potential confounders in Model 3, only ARHL was significantly associated with LBP (OR, 1.53; 95% CI, 1.11–2.13). ARHL was not associated with LBP in the final model (Model 4) (OR, 1.33; 95% CI, 0.94–1.89).

**Table 2. Hearing impairments and hearing thresholds in the study population categorized according to the presence of low back pain.**

| Variables                                                     | Low back pain   |                | P value |
|---------------------------------------------------------------|-----------------|----------------|---------|
|                                                               | Yes (n = 1,414) | No (n = 4,090) |         |
| Hearing impairment                                            |                 |                | <0.001  |
| Normal                                                        | 45.8% (1.7%)    | 58.7% (1.0%)   |         |
| Unilateral hearing impairment                                 | 18.2% (1.2%)    | 17.2% (0.8%)   |         |
| Bilateral hearing impairment                                  | 36.0% (1.6%)    | 24.1% (0.8%)   |         |
| Severity of hearing impairment                                |                 |                | <0.001  |
| Mild hearing impairment (26–40 dB)                            | 23.8% (1.4%)    | 17.0% (0.7%)   |         |
| Moderate hearing impairment (41–70 dB)                        | 10.5% (1.0%)    | 6.4% (0.5%)    |         |
| Severe hearing impairment (>71 dB)                            | 1.7% (0.4%)     | 0.7% (0.2%)    |         |
| Age-related hearing loss                                      | 32.8% (1.9%)    | 18.3% (0.9%)   | <0.001  |
| Hearing thresholds at four frequencies (0.5, 1, 2, and 4 kHz) |                 |                |         |
| Lt                                                            | 29.0 (0.56)     | 24.0 (0.33)    | <0.001  |
| Rt                                                            | 27.8 (0.62)     | 23.3 (0.33)    | <0.001  |
| Hearing thresholds at high frequencies (4 and 6 kHz)          |                 |                |         |
| Lt                                                            | 48.1 (0.72)     | 43.2 (0.46)    | <0.001  |
| Rt                                                            | 45.3 (0.78)     | 41.2 (0.44)    | <0.001  |
| Subjective hearing impairment                                 | 12.6% (1.7%)    | 8.4% (0.7%)    | 0.007   |
| Tinnitus                                                      | 32.3% (1.5%)    | 23.9% (0.9%)   | <0.001  |
| Use of hearing aid or cochlear implant                        | 1.4% (0.4%)     | 0.8% (0.2%)    | 0.083   |

Data are presented as mean  $\pm$  standard error or estimated percentage (standard error).

<https://doi.org/10.1371/journal.pone.0291396.t002>

### Multivariable logistic regression analysis of the associations between age-related hearing loss, tinnitus, and LBP

The results of multivariable logistic regression analysis of the associations between age-related hearing loss, tinnitus, and low back pain are presented in Table 4. The results showed that when participants without both ARHL and tinnitus were defined as the reference group, participants with both ARHL and tinnitus were more likely to have LBP (OR, 1.86; 95% CI 1.11–3.11). However, there was no significant difference in the odds of developing LBP between participants with ARHL and no tinnitus and those with tinnitus and no ARHL (OR, 1.37 and 1.47; 95% CI, 0.90–2.07 and 0.97–2.24).

### Discussion

In this cross-sectional study, unilateral and bilateral hearing impairments were more common in participants with LBP than in those without LBP. In addition, mild, moderate, severe, and ARHL were more common in participants with LBP than in those without LBP. After adjusting for potential confounding factors, ARHL with tinnitus was significantly correlated with LBP.

ARHL is characterized by symmetrical sensorineural loss of hearing at high frequencies, which can be identified in noise [19], resulting in confusion, conversational breakdown, and social isolation, and affecting an individual's psychosocial status [20]. Specifically, difficulty with speech perception in a noisy environment gradually progresses into difficulty with speech perception in a quiet environment, resulting in communication errors or worse. Poor perception of speech and warning sounds can result in social isolation and decrease in daily physical activities and exercise that could prevent LBP.



**Table 3. Logistic regression analysis of the association between hearing impairment and low back pain.**

|                               | Model 1 |             | Model 2 |             | Model 3 |             | Model 4 |             |
|-------------------------------|---------|-------------|---------|-------------|---------|-------------|---------|-------------|
|                               | OR      | 95%CI       | OR      | 95%CI       | OR      | 95%CI       | OR      | 95%CI       |
| Hearing impairment            |         |             |         |             |         |             |         |             |
| Yes                           | 1.3     | (1.09–1.54) | 1.16    | (0.97–1.40) | 1.2     | (0.95–1.52) | 1.17    | (0.91–1.50) |
| Normal                        | 1       |             | 1       |             | 1       |             | 1       |             |
| Unilateral hearing impairment |         |             |         |             |         |             |         |             |
| Yes                           | 1.23    | (0.99–1.52) | 1.13    | (0.91–1.40) | 1.14    | (0.87–1.50) | 1.21    | (0.90–1.62) |
| Normal                        | 1       |             | 1       |             | 1       |             | 1       |             |
| Bilateral hearing impairment  |         |             |         |             |         |             |         |             |
| Yes                           | 1.36    | (1.11–1.66) | 1.19    | (0.96–1.48) | 1.25    | (0.96–1.64) | 1.13    | (0.85–1.51) |
| Normal                        | 1       |             | 1       |             | 1       |             | 1       |             |
| Age-related hearing loss      |         |             |         |             |         |             |         |             |
| Yes                           | 1.54    | (1.21–1.97) | 1.39    | (1.07–1.81) | 1.53    | (1.11–2.13) | 1.33    | (0.94–1.89) |
| Normal                        | 1       |             | 1       |             | 1       |             | 1       |             |
| Subjective hearing impairment |         |             |         |             |         |             |         |             |
| Yes                           | 1.61    | (1.15–2.26) | 1.7     | (1.19–2.42) | 1.52    | (0.94–2.46) | 1.12    | (0.84–1.49) |
| No                            | 1       |             | 1       |             | 1       |             | 1       |             |

OR, odds ratio; CI, Confidence interval

Model 1: adjusted for age and sex.

Model 2: adjusted for age, sex, household income, occupation, education, smoking status, alcohol consumption, and muscle-strengthening exercise.

Model 3: adjusted for age, sex, household income, occupation, education, smoking status, alcohol consumption, and muscle-strengthening exercise, appendicular skeletal muscle mass index, osteoporosis, Kellgren–Lawrence grading of the lumbar spine, and comorbidities.

Model 4: adjusted for age, sex, household income, occupation, education, smoking status, alcohol consumption, muscle-strengthening exercise, appendicular skeletal muscle mass index, osteoporosis, Kellgren–Lawrence grading of the lumbar spine, comorbidities, tinnitus, use of hearing aid use or cochlear implant, limitation of activity, and dietary intake of protein, retinol, riboflavin, and niacin.

<https://doi.org/10.1371/journal.pone.0291396.t003>

Aerobic exercise plays a crucial role in relieving LBP and preventing further damage by increasing blood flow and supply of nutrients to the soft tissues in lumbar spine structures, which improves the healing process in damaged tissues and reduces stiffness [21]. Muscle strengthening exercises increase strength and control of the trunk muscles to improve spinal

**Table 4. Associations between age-related hearing loss, tinnitus, and low back pain.**

|                                               | Model 1 |             | Model 2 |             | Model 3 |             | Model 4 |             |
|-----------------------------------------------|---------|-------------|---------|-------------|---------|-------------|---------|-------------|
|                                               | OR      | 95%CI       | OR      | 95%CI       | OR      | 95%CI       | OR      | 95%CI       |
| Age-related hearing loss (+) and tinnitus (+) | 1.97    | (1.41–2.76) | 1.75    | (1.22–2.52) | 2.06    | (1.28–3.32) | 1.86    | (1.11–3.11) |
| Age-related hearing loss (+) and tinnitus (-) | 1.48    | (1.10–2.01) | 1.33    | (0.98–1.82) | 1.45    | (0.97–2.16) | 1.37    | (0.90–2.07) |
| Age-related hearing loss (-) and tinnitus (+) | 1.38    | (1.03–1.85) | 1.35    | (0.99–1.84) | 1.47    | (0.99–2.17) | 1.47    | (0.97–2.24) |
| Age-related hearing loss (-) and tinnitus (-) | 1       |             | 1       |             | 1       |             | 1       |             |

OR, odds ratio; CI, Confidence interval

Model 1: adjusted for age and sex.

Model 2: adjusted for age, sex, household income, occupation, education, smoking status, alcohol consumption, and muscle-strengthening exercise.

Model 3: adjusted for age, sex, household income, occupation, education, smoking status, alcohol consumption, and muscle-strengthening exercise, appendicular skeletal muscle mass index, osteoporosis, Kellgren–Lawrence grading of the lumbar spine, and comorbidities.

Model 4 adjusted age, sex, household income, occupation, education, smoking status, alcohol consumption, and muscle-strengthening exercise, appendicular skeletal muscle mass index, osteoporosis, Kellgren–Lawrence grading of the lumbar spine, comorbidities, hearing aid use or cochlear implant, activity limitation, dietary intake of protein, retinol, riboflavin, and niacin.

<https://doi.org/10.1371/journal.pone.0291396.t004>



instability attributable to decreased physical disability and trunk muscle inactivity in patients with LBP [22]. The findings of this study are in line with those of previous studies that showed that people without LBP engage in muscle-strengthening exercises more often than those with LBP ( $P < 0.001$ ). Physical activity increases aerobic capacity and muscle strength around the spine. However, older people with ARHL may not engage in physical activity regularly owing to difficulties with daily communication and social isolation [23, 24]. Reduced physical activity is associated with an increased incidence of chronic LBP. Moreover, walking at a slow speed is insufficient for rebuilding atrophied muscles in older people, making the development of LBP inevitable [25].

Loss of proprioception resulting in alteration in lumbar spine motion can contribute to LBP [26]. Proprioception allows for perception of the static and dynamic position of the body, and is crucial for controlling movement. Auditory input is as important as visual, vestibular, and proprioceptive inputs for self-perception of movements [27]. Hearing loss does not allow for dynamic tracking of body position for engagement in daily physical activities. Bang et al. [28] reported that moderate hearing loss is associated with postural instability in persons aged 40 years or older. In addition, Shayman et al. [29] suggested that hearing aids and cochlear implants improve gait performance through the improvement of static balance. In the present study, ARHL and tinnitus were more common in patients with LBP than in those without LBP. Our findings could be explained by the abovementioned associations reported in previous studies. The results of the present study suggest that reduced engagement in muscle-strengthening exercises and physical activities secondary to loss of proprioception caused by ARHL may lead to LBP.

Tinnitus is common in older adults, and it can occur as a result of hearing loss [30]. A previous study indicated that tinnitus is associated with chronic pain, and that both tinnitus and pain are subjective symptoms. The study also indicated that noise sensitivity is correlated with generalized sensitivity [13]. ARHL with tinnitus can make speech comprehension and conversation more difficult than ARHL without tinnitus [31].

In this study, we also evaluated the association between subjective hearing impairment and LBP. Subjective hearing impairment was more common in participants with LBP than in those without LBP ( $P = 0.007$ ). In clinical practice, some patients with intractable LBP who present with subjective hearing impairment may not communicate effectively during treatment due to a lack of concentration or misunderstanding during conversation. A previous study of the Korean population identified that subjective hearing impairment is the main factor associated with decreased quality of communication in the elderly [32]. The first sign of sensorineural hearing loss is difficulty hearing in noisy environments. Compared with high frequency hearing impairment, difficulty with comprehension during conversation leads to low discrimination scores in the speech-in-noise test [33].

The results of this study showed that lower ASM index, osteoporosis, and lumbar spine osteoarthritis were associated with LBP, a finding that is in line with the results of previous studies. Age-related loss of muscle mass and fat degeneration contribute to chronic LBP in older patients owing to the sarcopenic changes in trunk muscles that occur with increasing age [34]. In addition, osteoporosis causes reduction in bone mass and micro-architectural deterioration of bony structures, which causes bones to become fragile and increases the risk of fractures, leading to reduction in spinal height and development of a hunched posture that makes the individual susceptible to LBP [35]. Spinal degeneration is also associated with LBP and reduced physical function. Goode et al. [36] reported that spinal osteoarthritis is associated with pain, disability, and reduced function, and should not be ignored. The progressive loss of muscle mass, bone loss, and spinal degeneration in older adults caused by sarcopenia, osteoporosis, and lumbar osteoarthritis lead to postural changes and reduced physical activity, which in turn lead to the development of chronic LBP.

Some older people consider hearing loss as a part of the aging process and do not consider seeking treatment. When untreated or under-treated patients with ARHL visit a clinic for the treatment of LBP, they often cannot communicate effectively for clinicians to explain disease progression, course of treatment, and preventive measures; therefore, they show a tendency towards intractable neuropathic pain. Female healthcare providers who speak at a higher pitch are more likely to have difficulties communicating with older people in clinical practice because ARHL is characterized by progressive sensorineural hearing loss, especially at high frequencies. Appropriate correction and prevention of hearing impairment should be encouraged to reduce the risk of intractable LBP in older adults.

This study had several limitations. First, given that we used cross-sectional data (KNHANES) for this study, the causal relationship between hearing loss with tinnitus and LBP was unclear. Second, we evaluated the frequency of performing muscle-strengthening exercises using the question “In the past week, how many days did you perform strength training exercises such as push-ups, sit-ups, or lifting dumbbells, weights, or barbells?”. The questionnaire did not include additional questions on the intensity or duration of the exercises. If differences in effect of ARHL with tinnitus on LBP according to the intensity or duration of exercises were known, a more specific explanation of the mechanism underlying the association between ARHL with tinnitus and LBP would have been provided. Third, age is a top-coding category in the KNHANES, and the ages of all participants older than 80 years are coded as 80 years. In the statistical analysis, we divided age into four categories at intervals of 10 years. Therefore, whether our results can be applied to adults older than 80 years is unclear. A further prospective study that includes participants in a wider range of age groups is necessary to clarify the association between ARHL with tinnitus and LBP in the middle-aged and older population.

## Conclusion

This study demonstrated that ARHL with tinnitus is significantly associated with LBP. The results of this study indicate that untreated hearing loss with tinnitus in middle-aged and older adults can increase the risk of intractable LBP. ARHL and tinnitus may be crucial factors associated with intractable LBP in elderly persons. Elderly patients with ARHL and tinnitus should be encouraged to increase their daily physical activities and engage in more muscle-strengthening exercises to prevent LBP.

## Supporting information

**S1 Checklist. STROBE statement—checklist of items that should be included in reports of observational studies.**

(DOCX)

## Author Contributions

**Conceptualization:** Yi Hwa Choi.

**Formal analysis:** Hye-Mi Noh.

**Investigation:** Hye-Ji An, Keum Ji Kim.

**Methodology:** Yi Hwa Choi, Jee Hye Wee.

**Resources:** Jee Hye Wee.

**Supervision:** Hong Ji Song, Soo Kyung Lee.

**Visualization:** Min Soo Jang, Nayoung Yeon.

**Writing – original draft:** Hye-Mi Noh, Yi Hwa Choi.

**Writing – review & editing:** Hye-Mi Noh, Yi Hwa Choi.

## References

1. World Health Organization. Deafness and hearing loss. 2021. Available from: <https://www.who.int/news-room/fact-sheets/detail/deafness-and-hearing-loss>
2. Ministry of Health and Welfare. Statistics annual report 2000. Sejong (KR): Ministry of Health and Welfare c2015 [cited 2015 Jan 19]. Available from: <http://stat.mw.go.kr/>.
3. Dalton DS, Cruickshanks KJ, Klein BE, Klein R, Wiley TL, Nondahl DM. The impact of hearing loss on quality of life in older adults. *Gerontologist*. 2003; 43:661–668. <https://doi.org/10.1093/geront/43.5.661> PMID: 14570962
4. Lin FR, Ferrucci L, Metter EJ, An Y, Zonderman AB, Resnick SM. Hearing loss and cognition in the Baltimore Longitudinal Study of Aging. *Neuropsychology*. 2011; 25:763–770. <https://doi.org/10.1037/a0024238> PMID: 21728425
5. Manchikanti L, Singh V, Datta S, Cohen SP, Hirsch JA, American Society of Interventional Pain Physicians. Comprehensive review of epidemiology, scope, and impact of spinal pain. *Pain Physician*. 2009; 12(4):E35–70.
6. Waterman BR, Belmont PJ Jr, Schoenfeld AJ. Low back pain in the United States: Incidence and risk factors for presentation in the emergency setting. *Spine J*. 2012; 12:63–70. <https://doi.org/10.1016/j.spinee.2011.09.002> PMID: 21978519
7. Lin FR, Metter EJ, O'Brien RJ, Resnick SM, Zonderman AB, Ferrucci L. Hearing loss and incident dementia. *Arch Neurol*. 2011; 68:214–220. <https://doi.org/10.1001/archneurol.2010.362> PMID: 21320988
8. Uhlmann RF, Larson EB, Rees TS, Koepsell TD, Duckert LG. Relationship of hearing impairment to dementia and cognitive dysfunction in older adults. *JAMA*. 1989; 261:1916–1919. PMID: 2926927
9. Lee J, Han K, Song JJ, Chae SW. Sarcopenia and hearing loss in older Koreans: Findings from the Korean National Health and Nutrition Examination Survey (KNHANES) 2010. *PLoS One*. 2015; 15:11:e0150281.
10. Upala S, Rattanawong P, Vutthikraivit W, Sanguankeo A. Significant association between osteoporosis and hearing loss: a systematic review and meta-analysis. *Braz J Otorhinolaryngol*. 2017; 83:646–652. <https://doi.org/10.1016/j.bjorl.2016.08.012> PMID: 27670202
11. Hackenberg B, O'Brien K, Döge J, Lackner KJ, Beutel ME, Münzel T, et al. Tinnitus prevalence in the adult population—results from the Gutenberg Health Study. *Medicina (Kaunas)*. 2023; 59:620. <https://doi.org/10.3390/medicina59030620> PMID: 36984621
12. Isaacson JE, Moyer MT, Schuler HG, Blackall GF. Clinical associations between tinnitus and chronic pain. *Otolaryngol Head Neck Surg*. 2003; 128:706–10. <https://doi.org/10.1016/S0194-59980300227-4> PMID: 12748565
13. Ausland JH, Engdahl B, Oftedal B, Steingrimsdóttir Ó A, Nielsen CS, Hopstock LA, et al. Tinnitus and associations with chronic pain: The population-based Tromsø Study (2015–2016). *PLoS One*. 2021; 16:e0247880.
14. Report of the informal working group on prevention of deafness and hearing impairment programme planning, Geneva, 18–21 June 1991. Geneva: World Health Organization; 1991. Available from: <http://www.who.int/iris/handle/10665/58839> [cited 2023 June 1].
15. Lee HS, Lee YJ, Kang BS, Lee BD, Lee JS. A clinical analysis of sudden sensorineural hearing loss cases. *Korean journal of audiology*. 2014; 18:69–75. <https://doi.org/10.7874/kja.2014.18.2.69> PMID: 25279228
16. Yoshimura N, Muraki S, Oka H, Mabuchi A, En-Yo Y, Yoshida M, et al. Prevalence of knee osteoarthritis, lumbar spondylosis, and osteoporosis in Japanese men and women: The Research on Osteoarthritis/Osteoporosis Against Disability Study. *J Bone Miner Metab*. 2009; 27:620–628. <https://doi.org/10.1007/s00774-009-0080-8> PMID: 19568689
17. Chen LK, Woo J, Assantachai P, Auyeung TW, Chou MY, Iijima K, et al. Consensus update on sarcopenia diagnosis and treatment. *J Am Med Dir Assoc*. 2019; 21:300–307.e2.
18. National Rural Resources Development Institute; Rural Development Administration. Food Composition Table, 7th ed. Guildford, UK: Medpharm; 2006.
19. Gates GA, Mills JH. Presbycusis. *Lancet*. 2005; 366:1111–1120. [https://doi.org/10.1016/S0140-6736\(05\)67423-5](https://doi.org/10.1016/S0140-6736(05)67423-5) PMID: 16182900

20. Gennis V, Garry PJ, Haaland KY, Yeo RA, Goodwin JS. Hearing and cognition in the elderly. New findings and a review of the literature. *Arch Intern Med*. 1991; 151:2259–2264. PMID: [1953231](#)
21. Gordon R, Bloxham S. A systematic review of the effects of exercise and physical activity on non-specific chronic low back pain. *Healthcare (Basel)*. 2016; 4:22. <https://doi.org/10.3390/healthcare4020022> PMID: [27417610](#)
22. Koumantakis GA, Watson PJ, Oldham JA. Trunk muscle stabilization training plus general exercise versus general exercise only: randomized controlled trial of patients with recurrent low back pain. *Phys Ther*. 2005; 85:209–225. PMID: [15733046](#)
23. Robins LM, Hill KD, Finch CF, Clemson L, Haines T. The association between physical activity and social isolation in community-dwelling older adults. *Aging Ment Health*. 2018; 22:175–82. <https://doi.org/10.1080/13607863.2016.1242116> PMID: [27736192](#)
24. Pels F, Kleinert J. Loneliness and physical activity: A systematic review. *Int Rev Sport Exerc Psychol*. 2016; 9:231–260.
25. Kim IY, Park S, Jang J, Wolfe RR. Understanding muscle protein dynamics: Technical considerations for advancing sarcopenia research. *Ann Geriatr Med Res*. 2020; 24:157–165. <https://doi.org/10.4235/agmr.20.0041> PMID: [32752586](#)
26. Tong MH, Mousavi SJ, Kiers H, Ferreira P, Refshauge K, van Dieën J. Is there a relationship between lumbar proprioception and low back pain? A systematic review with meta-analysis. *Arch Phys Med Rehabil*. 2017; 98:120–136.e2. <https://doi.org/10.1016/j.apmr.2016.05.016> PMID: [27317866](#)
27. Campos J, Ramkhalawansingh R, Pichora-Fuller MK. Hearing, self-motion perception, mobility, and aging. *Hear Res*. 2018; 369:42–55. <https://doi.org/10.1016/j.heares.2018.03.025> PMID: [29661612](#)
28. Bang SH, Jeon JM, Lee JG, Choi J, Song JJ, Chae SW. Association Between Hearing Loss and Postural Instability in Older Korean Adults. *JAMA Otolaryngol Head Neck Surg*. 2020; 146:530–534. <https://doi.org/10.1001/jamaoto.2020.0293> PMID: [32324231](#)
29. Shayman CS, Earhart GM, Hullar TE. Improvements in gait with hearing aids and cochlear implants. *Otol Neurotol*. 2017; 38:484–486. <https://doi.org/10.1097/MAO.0000000000001360> PMID: [28187057](#)
30. Baguley D, McFerran D, Hall D. Tinnitus. *Lancet (London, England)*. 2013; 382:1600–7. [https://doi.org/10.1016/S0140-6736\(13\)60142-7](https://doi.org/10.1016/S0140-6736(13)60142-7) PMID: [23827090](#)
31. Vielsmeier V, Kreuzer PM, Haubner F, Steffens T, Semmler PR, Kleinjung T, et al. Speech comprehension difficulties in chronic tinnitus and its relation to hyperacusis. *Front Aging Neurosci* 2016; 8:293. <https://doi.org/10.3389/fnagi.2016.00293> PMID: [28018209](#)
32. Go Y, Park M. Effects of subjective hearing handicap and perceived stress on quality of communication life of older adults. *Korean J Adult Nurs*. 2017; 29:496–504.
33. Sheikh Rashid M, Leensen MCJ, de Laat JAPM, Dreschler WA. Laboratory evaluation of an optimised internet-based speech-in-noise test for occupational high-frequency hearing loss screening: Occupational Earcheck. *Int J Audiol*. 2017; 56:844–853. <https://doi.org/10.1080/14992027.2017.1333634> PMID: [28587489](#)
34. Sakai Y, Matsui H, Ito S, Hida T, Ito K, Koshimizu H, et al. Sarcopenia in elderly patients with chronic low back pain. *Osteoporos Sarcopenia*. 2017; 3:195–200. <https://doi.org/10.1016/j.afos.2017.09.001> PMID: [30775530](#)
35. Paolucci T, Saraceni VM, Piccinini G. Management of chronic pain in osteoporosis: challenges and solutions. *J Pain Res*. 2016; 9:177–186. <https://doi.org/10.2147/JPR.S83574> PMID: [27099529](#)
36. Goode AP, Carey TS, Jordan JM. Low back pain and lumbar spine osteoarthritis: How are they related? *Curr Rheumatol Rep*. 2013; 15:30. <https://doi.org/10.1007/s11926-012-0305-z> PMID: [23307577](#)
